# Supplementary material
Source: PubMed Central journal article supplement (PMC9345631)
Supplement: cc9-4-e0722-s001.pdf [file cc9-4-e0722-s001.pdf]

Online Supplemental Files for: **Hilton RS, Hauschildt K, Shah M, Kowalkowski MA, Taylor SP**. Assessment of social determinants of health in post-sepsis mortality and readmission: a scoping review

PRISMA checklist

Online Supplement Table 1. Search strategy used to identify eligible articles.

Online Supplement Table 2. Eligible studies that did not include social determinants of health

Online Supplement Table 3. Additional data from eligible studies that did include social determinants of health

Online Supplement Table 4. Characteristics of studies including versus not including SDH in evaluation post-sepsis mortality or readmission.

Online Supplement Appendix 1. References for eligible studies that did not include social determinants of health

Study Protocol

## Preferred Reporting Items for Systematic reviews and Meta-Analyses extension for Scoping Reviews (PRISMA-ScR) Checklist

| SECTION                                               | ITEM | PRISMA-ScR CHECKLIST ITEM                                                                                                                                                                                                                                                                                  | REPORTED ON PAGE # |
|-------------------------------------------------------|------|------------------------------------------------------------------------------------------------------------------------------------------------------------------------------------------------------------------------------------------------------------------------------------------------------------|--------------------|
| <b>TITLE</b>                                          |      |                                                                                                                                                                                                                                                                                                            |                    |
| Title                                                 | 1    | Identify the report as a scoping review.                                                                                                                                                                                                                                                                   | 1                  |
| <b>ABSTRACT</b>                                       |      |                                                                                                                                                                                                                                                                                                            |                    |
| Structured summary                                    | 2    | Provide a structured summary that includes (as applicable): background, objectives, eligibility criteria, sources of evidence, charting methods, results, and conclusions that relate to the review questions and objectives.                                                                              | 2-3                |
| <b>INTRODUCTION</b>                                   |      |                                                                                                                                                                                                                                                                                                            |                    |
| Rationale                                             | 3    | Describe the rationale for the review in the context of what is already known. Explain why the review questions/objectives lend themselves to a scoping review approach.                                                                                                                                   | 4                  |
| Objectives                                            | 4    | Provide an explicit statement of the questions and objectives being addressed with reference to their key elements (e.g., population or participants, concepts, and context) or other relevant key elements used to conceptualize the review questions and/or objectives.                                  | 4                  |
| <b>METHODS</b>                                        |      |                                                                                                                                                                                                                                                                                                            |                    |
| Protocol and registration                             | 5    | Indicate whether a review protocol exists; state if and where it can be accessed (e.g., a Web address); and if available, provide registration information, including the registration number.                                                                                                             | supplement         |
| Eligibility criteria                                  | 6    | Specify characteristics of the sources of evidence used as eligibility criteria (e.g., years considered, language, and publication status), and provide a rationale.                                                                                                                                       | 5                  |
| Information sources*                                  | 7    | Describe all information sources in the search (e.g., databases with dates of coverage and contact with authors to identify additional sources), as well as the date the most recent search was executed.                                                                                                  | 5                  |
| Search                                                | 8    | Present the full electronic search strategy for at least 1 database, including any limits used, such that it could be repeated.                                                                                                                                                                            | Appendix           |
| Selection of sources of evidence†                     | 9    | State the process for selecting sources of evidence (i.e., screening and eligibility) included in the scoping review.                                                                                                                                                                                      | 6                  |
| Data charting process‡                                | 10   | Describe the methods of charting data from the included sources of evidence (e.g., calibrated forms or forms that have been tested by the team before their use, and whether data charting was done independently or in duplicate) and any processes for obtaining and confirming data from investigators. | 6                  |
| Data items                                            | 11   | List and define all variables for which data were sought and any assumptions and simplifications made.                                                                                                                                                                                                     | 6, appendix        |
| Critical appraisal of individual sources of evidence§ | 12   | If done, provide a rationale for conducting a critical appraisal of included sources of evidence; describe the methods used and how this information was used in any data synthesis (if appropriate).                                                                                                      | 6                  |

| SECTION                                       | ITEM | PRISMA-ScR CHECKLIST ITEM                                                                                                                                                                       | REPORTED ON PAGE # |
|-----------------------------------------------|------|-------------------------------------------------------------------------------------------------------------------------------------------------------------------------------------------------|--------------------|
| Synthesis of results                          | 13   | Describe the methods of handling and summarizing the data that were charted.                                                                                                                    | 7                  |
| <b>RESULTS</b>                                |      |                                                                                                                                                                                                 |                    |
| Selection of sources of evidence              | 14   | Give numbers of sources of evidence screened, assessed for eligibility, and included in the review, with reasons for exclusions at each stage, ideally using a flow diagram.                    | tables             |
| Characteristics of sources of evidence        | 15   | For each source of evidence, present characteristics for which data were charted and provide the citations.                                                                                     | tables             |
| Critical appraisal within sources of evidence | 16   | If done, present data on critical appraisal of included sources of evidence (see item 12).                                                                                                      | tables             |
| Results of individual sources of evidence     | 17   | For each included source of evidence, present the relevant data that were charted that relate to the review questions and objectives.                                                           | tables             |
| Synthesis of results                          | 18   | Summarize and/or present the charting results as they relate to the review questions and objectives.                                                                                            | tables             |
| <b>DISCUSSION</b>                             |      |                                                                                                                                                                                                 |                    |
| Summary of evidence                           | 19   | Summarize the main results (including an overview of concepts, themes, and types of evidence available), link to the review questions and objectives, and consider the relevance to key groups. | 9                  |
| Limitations                                   | 20   | Discuss the limitations of the scoping review process.                                                                                                                                          | 12                 |
| Conclusions                                   | 21   | Provide a general interpretation of the results with respect to the review questions and objectives, as well as potential implications and/or next steps.                                       | 12                 |
| <b>FUNDING</b>                                |      |                                                                                                                                                                                                 |                    |
| Funding                                       | 22   | Describe sources of funding for the included sources of evidence, as well as sources of funding for the scoping review. Describe the role of the funders of the scoping review.                 | 1                  |

From: Tricco AC, Lillie E, Zarin W, O'Brien KK, Colquhoun H, Levac D, et al. PRISMA Extension for Scoping Reviews (PRISMA-ScR): Checklist and Explanation. *Ann Intern Med.* 2018;169:467–473. doi: [10.7326/M18-0850](https://doi.org/10.7326/M18-0850).

Online Supplement Table 1. Initial Search strategy used to identify eligible articles

(hospital readmission[MeSH Terms]) OR (hospital readmissions[MeSH Terms]) OR (patient readmission[MeSH Terms]) OR (readmission, hospital[MeSH Terms]) OR (patient readmissions[MeSH Terms]) OR (late mortality[Title/Abstract]) OR (long-term mortality[Title/Abstract]) AND (((((((((((((((((((sepsis[MeSH Terms]) OR (sepsis, severe[MeSH Terms]) OR (sepsis syndrome[MeSH Terms]) OR (sepsis syndromes[MeSH Terms]) OR (septicemia[MeSH Terms]) OR (septicemia[Title/Abstract]) OR (septicaemia[Title/Abstract]) OR (sepsis[Title/Abstract]) OR (septic\*[Title/Abstract]))) Filters: English, from 1992/1/1 - 2021/5/1

Online Supplement Table 2. Eligible studies that did not include social determinants of health

| <b>Study ID</b>         | <b>Year of publication</b> | <b>Cohort size (n=?)</b> | <b>Multicenter (y/n)</b> | <b>Country of data source</b> |
|-------------------------|----------------------------|--------------------------|--------------------------|-------------------------------|
| Angus, 2004             | 2004                       | 1,690                    | yes                      | Multiple                      |
| Bozza, 2007             | 2007                       | 60                       | yes                      | Brazil                        |
| Brakenridge, 2019       | 2019                       | 301                      | no                       | U.S.                          |
| Braun, 2004             | 2004                       | >10000                   | yes                      | US                            |
| Buendgens, 2017         | 2017                       | 219                      | no                       | Germany                       |
| Burdick, 2020           | 2020                       | 17,758                   | yes                      | U.S.                          |
| Chao, 2014              | 2014                       | 15,535                   | yes                      | Taiwan                        |
| Contrin, 2013           | 2013                       | 349                      | no                       | Brazil                        |
| Danese, 2006            | 2006                       | 22,130                   | yes                      | U.S.                          |
| Dean, 2006              | 2006                       | 17,728                   | yes                      | U.S.                          |
| Deb, 2019               | 2019                       | 170,571                  | yes                      | U.S.                          |
| DeMerle & Royer, 2017   | 2017                       | 472                      | yes                      | U.S.                          |
| DeMerle & Vincent, 2017 | 2017                       | 26,561                   | yes                      | U.S.                          |
| Demiralp, 2017          | 2017                       | 100-1000                 | yes                      | U.S.                          |
| Dick, 2012              | 2012                       | 17,537                   | yes                      | U.S.                          |
| Dreiherr, 2012          | 2012                       | 5,155                    | yes                      | Israel                        |
| Drewry, 2014            | 2014                       | 335                      | no                       | US                            |
| Flesishman, 2021        | 2021                       | 116,507                  | yes                      | Germany                       |
| Gilmore, 2015           | 2015                       | 98                       | no                       | U.S.                          |
| Guirgis, 2021           | 2021                       | 104                      | no                       | U.S.                          |
| Haas, 2021              | 2021                       | 532                      | yes                      | Multiple                      |
| Henriksen, 2017         | 2017                       | 1,713                    | no                       | Denmark                       |
| Honselmann, 2015        | 2015                       | 1,406                    | no                       | Germany                       |
| Jia, 2021               | 2021                       | 4,370                    | no                       | U.S.                          |
| Jones, 2014             | 2014                       | 120,943                  | yes                      | U.S.                          |

|                       |      |         |     |                           |
|-----------------------|------|---------|-----|---------------------------|
| Kaukonen, 2014        | 2014 | 101,064 | yes | Australia and New Zealand |
| Khoury, 2017          | 2017 | 259     | no  | Israel                    |
| Kim, 2019             | 2019 | 274     | no  | South Korea               |
| Kim, 2021             | 2021 | 4,625   | yes | South Korea               |
| Laupland, 2005        | 2005 | 4,845   | yes | Canada                    |
| Lee, 2008             | 2008 | 525     | no  | U.S.                      |
| Li, 2018              | 2018 | 112     | no  | China                     |
| Lichtenauer, 2017     | 2017 | 348     | no  | Germany                   |
| Linder, 2014          | 2014 | 2,289   | no  | Canada                    |
| Liu, 2014             | 2014 | 6,344   | yes | U.S.                      |
| Liu, 2021             | 2021 | 1,405   | yes | U.S.                      |
| Meurer, 2010          | 2010 | 50      | no  | US                        |
| Nessler, 2013         | 2013 | 96      | no  | france                    |
| Norman, 2017          | 2017 | 633,407 | yes | U.S.                      |
| Ou, 2016              | 2016 | >10000  | yes | Taiwan                    |
| Perner, 2014          | 2014 | 804     | yes | dutch                     |
| Prescott, 2015        | 2015 | 46,575  | yes | U.S.                      |
| Prescott, 2015        | 2015 | 2,843   | yes | U.S.                      |
| Prescott, 2016        | 2016 | 3,029   | yes | U.S.                      |
| Prescott, 2017        | 2017 | 28,618  | yes | U.S.                      |
| Quartin, 1997         | 1997 | 1,505   | yes | U.S.                      |
| Rahmel, 2020          | 2020 | 83,974  | yes | Germany                   |
| Ranzani, 2013         | 2013 | 229     | no  | Brazil                    |
| Rice Crescencio, 2012 | 2012 | 127     | no  | U.S.                      |
| Rice, 2013            | 2013 | 56,527  | yes | U.S.                      |
| Rygård, 2016          | 2016 | 1,005   | yes | Denmark                   |
| Sasse, 1995           | 1995 | 153     | no  | US                        |
| Scheer, 2017          | 2017 | 14,115  | no  | Germany                   |

|                  |      |           |     |          |
|------------------|------|-----------|-----|----------|
| Schmidt, 2020    | 2020 | 1,975     | no  | Germany  |
| Singh, 2019      | 2019 | 1,068     | no  | U.S.     |
| Stenholt, 2021   | 2021 | 662       | no  | Denmark  |
| Stiermaier, 2013 | 2013 | 139       | yes | Multiple |
| Storgaard, 2013  | 2013 | 212       | no  | Denmark  |
| Styrvoky, 2015   | 2015 | 230       | no  | U.S.     |
| Styrvoky, 2016   | 2016 | 1,049     | no  | U.S.     |
| Tacke, 2014      | 2014 | 299       | no  | Germany  |
| Tacke, 2016      | 2016 | 311       | no  | Germany  |
| Taylor, 2020     | 2020 | 189       | yes | U.S.     |
| Tsaganos, 2016   | 2016 | 200       | yes | Greece   |
| Tsen, 2015       | 2015 | 990       | yes | non-US   |
| Vashi, 2013      | 2013 | 4,028,555 | yes | U.S.     |
| Vasile, 2013     | 2013 | 926       | no  | U.S.     |
| Wang, 2014       | 2014 | 29,644    | yes | U.S.     |
| Weinreich, 2017  | 2017 | 1,355     | no  | US       |
| Weycker, 2003    | 2003 | 16,019    | yes | U.S.     |
| Whiles, 2016     | 2016 | 7,071     | no  | US       |
| Yende, 2014      | 2014 | 823,462   | yes | U.S.     |
| Yende, 2019      | 2019 | 483       | yes | U.S.     |
| Zhao, 2021       | 2021 | 183       | no  | China    |
| Zilberberg, 2015 | 2015 | 1,697     | no  | U.S.     |





Online Supplement Table 3. Additional data from eligible studies that did include social determinants of health

| Study ID (Author, year) | Cohort data source (single/multi center, n = )                                     | Cohort description                                                                                  | Follow-up method and outcome assessment                                                                                                                                        | Social determinants included                                   | Social determinant assessment method (EHR, survey, census)                                                                                    | Social determinant level (individual or neighborhood) | Missing data on social determinants (low, high) | Confounder assessment        | SDOH independently associated with outcomes |
|-------------------------|------------------------------------------------------------------------------------|-----------------------------------------------------------------------------------------------------|--------------------------------------------------------------------------------------------------------------------------------------------------------------------------------|----------------------------------------------------------------|-----------------------------------------------------------------------------------------------------------------------------------------------|-------------------------------------------------------|-------------------------------------------------|------------------------------|---------------------------------------------|
| Schnegelsberg, 2016     | Aarhus University Hospital, Denmark, Nov 2008 - Dec 2010 sepsis cohort, SC, n= 387 | Adult sepsis, severe sepsis, septic shock patients (ICU); definitions per Surviving Sepsis Campaign | 30-day mortality post ICU admission<br><br><b>80-day mortality after hospital discharge</b><br><br><b>First unplanned readmission within 180 days after hospital discharge</b> | 1.Education level<br><br>2.Income<br><br>3.Cohabitation status | 1.Database (Population's Education Register)<br><br>2.Database (Income Statistic Register)<br><br>3.Database (Population Statistics Register) | 1.Individual<br><br>2.Individual<br><br>3.Individual  | Low                                             | Yes, Cox regression analysis | 30-day mortality: income (low)              |

|                           |                                                                                                   |                                                                                                                                                            |                                                                                                   |                |                |              |              |                                                           |                                                                                 |
|---------------------------|---------------------------------------------------------------------------------------------------|------------------------------------------------------------------------------------------------------------------------------------------------------------|---------------------------------------------------------------------------------------------------|----------------|----------------|--------------|--------------|-----------------------------------------------------------|---------------------------------------------------------------------------------|
| Leu, 2013<br>(abstract)   | Lincoln Medical and Mental Health Center, Bronx, NY, 2009-2011, SC, n= 479                        | Survivors of severe sepsis and septic shock (medical-ICU)                                                                                                  | Hospital mortality<br>ICU/hospital LOS<br><b>30-day readmission</b><br><b>180-day readmission</b> | 1.Ethnicity    | 1.EHR          | 1.Individual | Not reported | Yes, logistics regression analysis, multivariate analysis | 30-day readmission: Latino background<br>180-day readmission; Latino background |
| Ahmad, 2014<br>(abstract) | Healthcare Costs and Utilization Project State Inpatient Database (CA), 2006-2011, MC, n= 640,954 | Patients hospitalized for severe sepsis; ICD-9-CM                                                                                                          | In-hospital mortality<br><b>30-day readmission</b><br>Length of stay                              | 1.Homelessness | 1.Database     | 1.Individual | Not reported | Yes, multivariate logistic regression                     | None                                                                            |
| Davis, 2014               | Royal Darwin Hospital, Tiwi, Darwin, NT, May 6 2007-May 5 2008, SC, n= 1028                       | All patients hospitalized for sepsis between May 6 2007-May 5 2008; 1992 ACCP-SCCM criteria. Severe sepsis identified as per definitions in PROWESS study. | <b>5-year mortality</b>                                                                           | 1.Race         | 1.Not reported | 1.Individual | Not reported | Kaplan-Meier Survival Rate estimates                      | Mortality: Race (higher risk if Indigenous (Aboriginal Australian))             |

|                          |                                                                                         |                                                                                                                                                         |                                                                               |                                                                                  |                                        |                                                  |              |                                             |                                                                                                       |
|--------------------------|-----------------------------------------------------------------------------------------|---------------------------------------------------------------------------------------------------------------------------------------------------------|-------------------------------------------------------------------------------|----------------------------------------------------------------------------------|----------------------------------------|--------------------------------------------------|--------------|---------------------------------------------|-------------------------------------------------------------------------------------------------------|
| Bath, 2019<br>(abstract) | Nationwide Inpatient Sample data, 2012-2014, MC, n= 3,082,888                           | All patients discharged with primary diagnosis of septicemia                                                                                            | <b>30-day readmission</b>                                                     | 1.Payer type<br>2.Median income per zip code<br>3.Residential type (metro, etc.) | 1.Database<br>2.Database<br>3.Database | 1.Individual<br>2.Neighborhood<br>3.Neighborhood | Not reported | No                                          | 30-day readmission rate: payer type (under Medicare), residential type (Living in Metropolitan areas) |
| Davis, 2011              | Royal Darwin Hospital, Tiwi, Darwin, NT, May 6 2007-May 5 2008, SC, n= 1090             | Patients with probable or definite infection and meeting at least two or more SIRS criteria                                                             | Hospital mortality<br><b>28-day mortality</b>                                 | 1.Race                                                                           | 1.Not reported                         | 1.Individual                                     | Not reported | Yes, univariate and multivariate regression | None                                                                                                  |
| Abu-Kaf, 2018            | Israeli Sepsis Group (ISR-SEPSIS) database, 2003-2011, MC, n= 409                       | Sepsis survivors discharged from ICU; ICD-9-CM                                                                                                          | Mortality<br><b>Long-term mortality (2 year)</b>                              | 1.Marital status                                                                 | 1.Not reported                         | 1.Individual                                     | Not reported | Chi-square test or Fisher exact test        | 2-year mortality: marital status                                                                      |
| Chao, 2016               | Taiwan's National Health Insurance Research Database (NHIRD), 1995-2011, MC, n= 272,879 | Patients, 20 years old or older, with first-time ICU hospitalization for sepsis; Septicemia defined with ICD-9-CM plus receipt of antimicrobial therapy | <b>1-year mortality</b><br><b>2-year mortality</b><br><b>5-year mortality</b> | 1.Monthly income<br>2.Urbanization                                               | 1.Database<br>2.Database               | 1.Individual<br>2.Neighborhood                   | Not reported | Yes, univariate and multivariate analysis   | None                                                                                                  |

|              |                                                                                                           |                                                                                                                                                                                                    |                                                                                                                                                                          |        |                     |              |              |                                             |      |
|--------------|-----------------------------------------------------------------------------------------------------------|----------------------------------------------------------------------------------------------------------------------------------------------------------------------------------------------------|--------------------------------------------------------------------------------------------------------------------------------------------------------------------------|--------|---------------------|--------------|--------------|---------------------------------------------|------|
|              |                                                                                                           | during hospitalization.                                                                                                                                                                            |                                                                                                                                                                          |        |                     |              |              |                                             |      |
| Ortego, 2015 | Hospital of the University of Pennsylvania, Dec 2007 - Jan 2010, SC, n= 997                               | Patients admitted from the ED with septic shock, defined as a serum lactate level $\geq 4$ mmol/L or systolic blood pressure $< 90$ mm Hg after volume resuscitation or use of a vasoactive agent. | ED visits (treat-and-release)<br><b>All-cause hospital readmission to any UPHS hospital within 30 days of discharge after the index hospitalization for septic shock</b> | 1.Race | 1.EHR               | 1.Individual | Low          | Yes, multivariate logistic regression       | None |
| Lopes, 2010  | Centro Hospitalar Lisboa Norte, Infectious Disease Intensive Care Unit, July 2002 - June 2007, SC, n= 234 | Sepsis survivors with AKI; sepsis classified in accordance with the American College of Chest Physicians and the Society of Critical Care                                                          | <b>2-year mortality</b>                                                                                                                                                  | 1.Race | 1.Unit database/EHR | 1.Individual | Not reported | Yes, univariate and multivariate regression | None |

|                    |                                                                                                                            |                                                                                                                                                                                            |                                                                                                    |        |            |              |     |                                                      |                                                                                                                                                                                                    |
|--------------------|----------------------------------------------------------------------------------------------------------------------------|--------------------------------------------------------------------------------------------------------------------------------------------------------------------------------------------|----------------------------------------------------------------------------------------------------|--------|------------|--------------|-----|------------------------------------------------------|----------------------------------------------------------------------------------------------------------------------------------------------------------------------------------------------------|
|                    |                                                                                                                            | Medicine consensus.                                                                                                                                                                        |                                                                                                    |        |            |              |     |                                                      |                                                                                                                                                                                                    |
| Shankar-Hari, 2019 | Intensive Care National Audit & Research Centre (ICNARC) Case Mix Programme, April 1, 2009 - March 31, 2014, MC, n= 94,748 | Adult patients sepsis survivors (ICU); Sepsis-3 criteria                                                                                                                                   | <b>All-cause long-term mortality (up to 6 years)</b>                                               | 1.Race | 1.Database | 1.Individual | Low | Yes, Cox regression analysis                         | Mortality: some or total dependency, (from KH: race as well (Asian and other less likely than White, I believe) They only intermittently mention in the abstract/findings, which is a little odd?) |
| Gameiro, 2020      | Division of Intensive Medicine of the Centro Hospitalar Universitário Lisboa Norte, Jan 2008 - Dec 2014, MC, n= 256        | Patients 18 years or older with a diagnosis of sepsis at admission to the Division of Intensive Medicine who developed AKI within the first week of ICU hospitalization; Sepsis-3 criteria | <b>30-day mortality</b><br><b>Long-term mortality (5 year)</b><br>Long-term adverse renal outcomes | 1.Race | 1.EHR      | 1.Individual | Low | Yes, multivariate and univariate regression analysis | None                                                                                                                                                                                               |

|                         |                                                                                                                                       |                                                                        |                                                    |                                                                             |                                                                      |                                                                  |              |                                                   |                                                                                                                     |
|-------------------------|---------------------------------------------------------------------------------------------------------------------------------------|------------------------------------------------------------------------|----------------------------------------------------|-----------------------------------------------------------------------------|----------------------------------------------------------------------|------------------------------------------------------------------|--------------|---------------------------------------------------|---------------------------------------------------------------------------------------------------------------------|
| Kaplan, 2017 (abstract) | University of Florida Hospital, August 2013 - December 2015, SC, n= 4,711                                                             | Patients 18 years or older admitted to university hospital with sepsis | <b>Recidivism (multiple admissions for sepsis)</b> | 1.Race                                                                      | 1.EHR                                                                | 1.Individual                                                     | Not reported | Uses univariate and bivariate chi-square analysis | Race                                                                                                                |
| Chang, 2015             | Healthcare Costs and Utilization Project's - California State Inpatient Database, 2009-2011, MC, n= 240,198 (Sepsis hospitalizations) | Adult patients hospitalized for sepsis; ICD-9 CM                       | <b>All-cause 30-day readmission rate</b>           | 1.Race<br>2.Medicare income by ZIP Code<br>3.Urbanicity<br>4.Payer Category | 1.Database<br>2.Database<br>3.Database<br>4.Database                 | 1.Individual<br>2.Neighborhood<br>3.Neighborhood<br>4.Individual | Not reported | Yes, logistic regression analysis                 | Higher odds of 20-day readmission; Race (Black, Native American), lower income, and residence in metropolitan areas |
| Donnelly, 2015          | UHC clinical database, MC, n= 345,657                                                                                                 | Severe sepsis, Angus definition                                        | <b>7-day readmissions 30-day readmissions</b>      | 1.Race 2. Payer type 3. Population setting (metro)4. Census region          | 1.EHR, linkage<br>2.EHR, linkage<br>3.EHR, linkage<br>4.EHR, linkage | 1.Individual<br>2.Individual<br>3.Neighborhood<br>4.Neighborhood | Not reported | Yes, mixed effects logistic regression            | Readmission: Medicaid                                                                                               |

|                       |                                                                                                                 |                                                                                                                 |                            |                                                                                      |                                                |                                                 |              |                                       |                                                                                                                                                  |
|-----------------------|-----------------------------------------------------------------------------------------------------------------|-----------------------------------------------------------------------------------------------------------------|----------------------------|--------------------------------------------------------------------------------------|------------------------------------------------|-------------------------------------------------|--------------|---------------------------------------|--------------------------------------------------------------------------------------------------------------------------------------------------|
| Goodwin, 2015         | Health Care Cost and Utilization Project State Inpatient Databases (CA, FL, NY), Q1 + Q2 of 2011, MC, n= 43,452 | Patients ≥ age 20 who experienced severe sepsis and/or septic shock; ICD-9 CM                                   | <b>30-day readmissions</b> | 1.Race<br>2.Payer type                                                               | 1.Database<br>2.Database                       | 1.Individual<br>2.Individual                    | Not reported | Yes, multivariate logistic regression | 30-day readmission; Race (Black), insurance type (Medicare and/or Medicaid)                                                                      |
| Galiatsatos, 2020     | Johns Hopkins Bayview Medical Center, 2017, SC, n= 647                                                          | Patients ≥ age 18 who were discharged with sepsis, severe sepsis, or septic shock; ICD-10 CM, Sepsis-3 criteria | <b>30-day readmissions</b> | 1.Race<br>2. Insurance type<br>3. Area deprivation index (neighborhood disadvantage) | 1.Database<br>2.Database<br>3.Database; census | 1.Individual<br>2.Individual<br>3. Neighborhood | Not reported | Yes, multivariate logistic regression | 30-day readmission; Area Deprivation Index (Neighborhood disadvantage)                                                                           |
| Rice, 2014 (abstract) | Healthcare Cost and Utilization Project database (FL), 2010, MC, n= not reported                                | Patients who survived index admission for sepsis, severe sepsis, or septic shock; ICD-9 CM                      | <b>30-day readmissions</b> | 1.Race<br>2.Income<br>3. Insurance                                                   | 1.Database<br>2.Database<br>3.Database         | 1.Individual<br>2.Individual<br>3.Individual    | Not reported | Yes, multivariate logistic regression | 30-day readmission; race (Hispanic, black)<br><br>Protective - Insurance (commercial or no insurance), discharge location (discharge to hospice) |

|             |                                                                                           |                                                                                                               |                                                             |                                                  |                                                       |                                              |              |                                         |      |
|-------------|-------------------------------------------------------------------------------------------|---------------------------------------------------------------------------------------------------------------|-------------------------------------------------------------|--------------------------------------------------|-------------------------------------------------------|----------------------------------------------|--------------|-----------------------------------------|------|
| Lemay, 2014 | Department of Veterans' Affairs Health Care databases, Oct 2001 - Sept 2007, MC, n= 2,727 | Patients ≥ age 65 discharged with sepsis diagnosis plus at least 1 code for acute organ dysfunction; ICD-9 CM | <b>90-365-day mortality</b><br><b>&gt;365 day mortality</b> | 1.Race<br>2.Married<br>3.VA Priority Group       | 1.Database<br>2.Database<br>3.Database                | 1.Individual<br>2.Individual<br>3.Individual | Not reported | Yes, cox proportional hazard regression | None |
| Sun, 2016   | University of Pennsylvania Health System, May 2012 - July 2012, MC, n= 444                | Adult sepsis survivors; ICD- 9 CM                                                                             | <b>30-day readmission</b>                                   | 1.Race<br>2.Marital Status<br>3.Insurance status | 1.Not reported<br>2.Not reported<br>3.Not reported    | 1.Individual<br>2.Individual<br>3.Individual | Not reported | Yes, multivariate logistic regression   | None |
| Jones, 2015 | University of Pennsylvania Health System, July 10 - July 2012, MC, n= 3,620               | Adult sepsis survivors; ICD- 9 CM                                                                             | <b>30-day readmission</b>                                   | 1.Race<br>2.Marital status<br>3.Insurance status | 1.Database; EHR<br>2.Database; EHR<br>3.Database; EHR | 1.Individual<br>2.Individual<br>3.Individual | Not reported | Yes, multivariate logistic regression   | None |



|                  |                                                                                                                                                                                                                                                                |                                                                                                                 |                                                                                                                                                      |                                                                                                   |                                              |                                    |              |                                         |                                                                                                                                                                              |
|------------------|----------------------------------------------------------------------------------------------------------------------------------------------------------------------------------------------------------------------------------------------------------------|-----------------------------------------------------------------------------------------------------------------|------------------------------------------------------------------------------------------------------------------------------------------------------|---------------------------------------------------------------------------------------------------|----------------------------------------------|------------------------------------|--------------|-----------------------------------------|------------------------------------------------------------------------------------------------------------------------------------------------------------------------------|
| Courtright, 2020 | Medicare Beneficiary Summary file, Medicare Inpatient Standard Analytic File (SAF), Outpatient SAF, Home Health SAF, Hospice SAF, Part B SAF, Chronic Conditions Warehouse, US Census data, Outcome and Assessment Information Set, 2013 - 2014, MC, n= 87,581 | Adult sepsis survivors who have received at least 1 home health care visit within 1 week of discharge; ICD-9 CM | <b>1-year mortality</b><br><br>Hospitalization in the last 30 days of life<br><br>Death in an acute care hospital<br><br>Hospice use among decedents | 1.Race/ethnicity<br><br>2.Medicaid eligibility                                                    | 1.Database; census<br><br>2.Database; census | 1.Individual<br><br>2.Individual   | Low          | Yes, multivariate logistic regression   | None                                                                                                                                                                         |
| Oh, 2021         | National Health Insurance database, South Korea, 2011 - 2014, MC, n= 45,826                                                                                                                                                                                    | Sepsis survivors admitted for sepsis or septic shock and survived for over 365 days; ICD-10 CM                  | <b>5-year all cause mortality</b>                                                                                                                    | 1.Residence at diagnosis of sepsis (Seoul, other metro city, or other area)<br><br>2.Income level | 1.Database<br><br>2.Database                 | 1.Neighborhood<br><br>2.Individual | Not reported | Yes, multivariable Cox regression model | 5-year all cause mortality; residence at diagnosis of sepsis (other metropolitan city [than Seoul], other area), follow-up after discharge (follow-up in the same hospital). |

|                    |                                                                                                                                                                                                                        |                                                                     |                                                                      |                                                                                                  |                              |                                    |              |                                        |                                                                                                                          |
|--------------------|------------------------------------------------------------------------------------------------------------------------------------------------------------------------------------------------------------------------|---------------------------------------------------------------------|----------------------------------------------------------------------|--------------------------------------------------------------------------------------------------|------------------------------|------------------------------------|--------------|----------------------------------------|--------------------------------------------------------------------------------------------------------------------------|
| Shankar-Hari, 2020 | Intensive Care National Audit & Research Centre Case Mix Programme database & Hospital Episode Statistics database and Office for National Statistics death registrations, April 1 2009 - March 31 2014, MC, n= 94,748 | Adult sepsis survivors; Sepsis-3 criteria                           | <b>Unplanned readmission (1 year)</b><br><br><b>1-year mortality</b> | 1.Race/ethnicity<br><br>2.IMD2015 in England quintiles                                           | 1.Database<br><br>2.Database | 1.Individual<br><br>2.Neighborhood | Not reported | Yes, multivariable logistic regression | Unplanned readmission & 1-year mortality; IMD2015 in England quintiles (Most deprived)                                   |
| Gadre, 2019        | Healthcare Cost and Utilization Project National Readmission Data, 2013 - 2014, MC, n= 1,030,335                                                                                                                       | Sepsis survivors; ICD-9 CM                                          | <b>30-day readmission</b>                                            | 1.Payer information<br><br>2.Median household income category for patient's ZIP code, percentile | 1.Database<br><br>2.Database | 1.Individual<br><br>2.Neighborhood | Low          | Yes, multivariable regression model    | 30-day readmission; payer information (decreased risk for private insurance and self-pay), decreased risk for higher SES |
| Bowles, 2020       | Medicare beneficiaries national dataset, July 1 2013 - June 30 2014, MC, n= 165,228                                                                                                                                    | Sepsis, severe sepsis, or septic shock survivors discharged to HHC; | <b>Readmissions (Out to 30-day)</b>                                  | 1.Race/ethnicity                                                                                 | 1.Database                   | 1.Individual                       | Low          | Yes, multivariate logistic regression  | None                                                                                                                     |

|              |                                            |                                                                                                                                                                                                                            |                                       |                                                                                                    |                                             |                                                                          |              |                               |                                                                                             |
|--------------|--------------------------------------------|----------------------------------------------------------------------------------------------------------------------------------------------------------------------------------------------------------------------------|---------------------------------------|----------------------------------------------------------------------------------------------------|---------------------------------------------|--------------------------------------------------------------------------|--------------|-------------------------------|---------------------------------------------------------------------------------------------|
|              |                                            | ICD-9 CM, Angus                                                                                                                                                                                                            |                                       |                                                                                                    |                                             |                                                                          |              |                               |                                                                                             |
| Lizza, 2021  | Barnes Jewish Hospital, SC, n= 3390        | ED patients with ICD-9 Clinical Modification code for either severe sepsis (995.92) or septic shock (785.52). Beginning in 2015, using ICD-10 Clinical Modification codes R65.20 (severe sepsis) and R65.21 (septic shock) | <b>Mortality Readmission (1-year)</b> | 1. Race<br><br>2. Insurance<br><br>3. Income using zip code                                        | 1. EHR<br><br>2. Linkage to Census database | 1. individual<br><br>2. individual<br><br>3. neighborhood                | Low          | Yes, regression but no causal | Increased readmission for Black race, decreased for uninsured, no differences for mortality |
| Farrah, 2021 | National Dataset in Canada, MC, n= 196,922 | ICD-10 Revision-coded algorithm (Sepsis-2 definition), including cases with organ dysfunction (severe                                                                                                                      | <b>Mortality Readmission (1-year)</b> | 1. Rural/urban<br><br>2. Neighborhood income<br><br>3. Ontario marginalization index (composite of | 1. EHR with linkage to national database    | 1. Neighborhood<br><br>2. Neighborhood<br><br>3. Neighborhood/Individual | Not Reported | Propensity score              | None                                                                                        |

|  |  |                                       |  |                                |  |  |  |  |  |
|--|--|---------------------------------------|--|--------------------------------|--|--|--|--|--|
|  |  | sepsis) and<br>without<br>(nonsevere) |  | race, other<br>social factors) |  |  |  |  |  |
|--|--|---------------------------------------|--|--------------------------------|--|--|--|--|--|

| Online Supplement Table 4. Characteristics of studies including ( <b>N = 28</b> ) versus not including ( <b>N = 75</b> ) social determinants of health in evaluation |              |                     |                                                       |
|----------------------------------------------------------------------------------------------------------------------------------------------------------------------|--------------|---------------------|-------------------------------------------------------|
| Study feature                                                                                                                                                        | No SDH n (%) | Included SDH, n (%) | Included SDH other than race ( <b>N = 19</b> ), n (%) |
| Year                                                                                                                                                                 |              |                     |                                                       |
| 1990-2000                                                                                                                                                            | 2 (3%)       | 0 (0%)              | 0 (0%)                                                |
| 2000-2010                                                                                                                                                            | 9 (12%)      | 1 (4%)              | 0 (0%)                                                |
| 2010-present                                                                                                                                                         | 64 (85%)     | 27 (96%)            | 19 (100%)                                             |
| Cohort size                                                                                                                                                          |              |                     |                                                       |
| <100                                                                                                                                                                 | 4 (5%)       | 0 (0%)              | 0 (0%)                                                |
| 100-<1000                                                                                                                                                            | 29 (39%)     | 8 (29%)             | 4 (21%)                                               |
| 1,000-10,000                                                                                                                                                         | 20 (27%)     | 6 (21%)             | 3 (16%)                                               |
| >10,000                                                                                                                                                              | 22 (29%)     | 14 (50%)            | 12 (63)                                               |
| Multicenter                                                                                                                                                          | 41 (55%)     | 19 (68%)            | 5 (26%)                                               |
| Country of data source                                                                                                                                               |              |                     |                                                       |
| United States                                                                                                                                                        | 41 (55%)     | 17 (61%)            | 14 (74%)                                              |
| Non-U.S.                                                                                                                                                             | 34 (45%)     | 11 (39%)            | 7 (37%)                                               |

Online Supplement Appendix 1. References for eligible studies that did not include social determinants of health

1. Angus DC, Laterre PF, Helterbrand J, et al. The Effect of Drotrecogin Alfa (activated) on Long-Term Survival after Severe Sepsis HHS Public Access. *Crit Care Med*. 2004;32(11):2199-2206.
2. Bozza FA, Salluh JI, Japiassu AM, et al. Cytokine profiles as markers of disease severity in sepsis: A multiplex analysis. *Crit Care*. 2007;11:R49. doi:10.1186/cc5783
3. Brakenridge SC, Efron PA, Cox MC, et al. Current Epidemiology of Surgical Sepsis: Discordance between Inpatient Mortality and 1-year Outcomes. *Ann Surg*. 2019;270(3):502-510. doi:10.1097/SLA.0000000000003458
4. Braun L, Aylin M, Riedel A, Cooper LM. Severe Sepsis in Managed Care: Analysis of Incidence, One-Year Mortality, and Associated Costs of Care. *J Manag Care Pharm*. 2004;10(6):521-530. www.amcp.org
5. Buendgens L, Yagmur E, Bruensing J, et al. Growth Differentiation Factor-15 Is a Predictor of Mortality in Critically Ill Patients with Sepsis. *Dis Markers*. 2017;2017. doi:10.1155/2017/5271203
6. Burdick H, Pino E, Gabel-Comeau D, et al. Effect of a sepsis prediction algorithm on patient mortality, length of stay and readmission: A prospective multicentre clinical outcomes evaluation of real-world patient data from US hospitals. *BMJ*. 2020;27:e100109. doi:10.1136/bmjhci-2019-100109
7. Chao PW, Shih CJ, Lee YJ, et al. Association of postdischarge rehabilitation with mortality in intensive care unit survivors of sepsis. *Am J Respir Crit Care Med*. 2014;190(9):1003-1011. doi:10.1164/rccm.201406-1170OC
8. Crescencio JCR, Leu M, Balaventakesh B, Loganathan R. Readmissions Among Patients With Severe Sepsis/Septic Shock Among Inner-City Minority New Yorkers. *Chest*. 2012;142(4):286A. doi:10.1378/chest.1390287
9. Danese MD, Griffiths RI, Dylan M, Yu HT, Dubois R, Nissenson AR. Mortality differences among organisms causing septicemia in hemodialysis patients. *Hemodial Int*. 2006;10:56-62.
10. Dean NC, Bateman KA, Donnelly SM, Silver MP, Snow GL, Hale D. Improved clinical outcomes with utilization of a community-acquired pneumonia guideline. *Chest*. 2006;130(3):794-799. doi:10.1378/chest.130.3.794
11. Deb P, Murtaugh CM, Bowles KH, et al. Does Early Follow-Up Improve the Outcomes of Sepsis Survivors Discharged to Home Health Care? *Med Care*. 2019;57(8):633-640. www.lww-medicalcare.com
12. Demerle KM, Royer SC, Mikkelsen ME, Prescott HC. Readmissions for recurrent sepsis: New or relapsed infection? *Crit Care Med*. 2017;45(10):1702-1708. doi:10.1097/CCM.0000000000002626
13. DeMerle KM, Vincent BM, Iwashyna TJ, Prescott HC. Increased healthcare facility use in veterans surviving sepsis hospitalization. *J Crit Care*. 2017;42:59-64. doi:10.1016/j.jcrc.2017.06.026

14. Demiralp B, He F, Koenig L, Hengesbach D, Prister J. A Regional Analysis of Patient Outcomes and Medicare Payments for Sepsis Patients Treated in Long-Term Care Hospitals and Skilled Nursing Facilities. In: *C23. CRITICAL CARE: WHAT CAN BE MEASURED CAN BE IMPROVED - INVESTIGATING THE EPIDEMIOLOGY AND OUTCOMES OF PATIENTS WITH ACUTE CRITICAL ILLNESS*. American Thoracic Society International Conference Abstracts. American Thoracic Society; 2017:A5023-A5023. doi:doi:10.1164/ajrccm-conference.2017.195.1\_MeetingAbstracts.A5023
15. Dick A, Liu H, Zwanziger J, et al. Long-term survival and healthcare utilization outcomes attributable to sepsis and pneumonia. *BMC Health Serv Res*. 2012;12(432). doi:10.1186/1472-6963-12-432
16. Dreiherr J, Almog Y, Sprung CL, et al. Temporal trends in patient characteristics and survival of intensive care admissions with sepsis: A multicenter analysis. *Crit Care Medicine*. 2012;40(3):855-860.
17. Drewry A, Samra N, Skrupky L, Fuller B, Compton S, Hotchkiss R. Persistent lymphopenia after diagnosis of sepsis predicts mortality. *Shock*. 2014;42(5):383-391. doi:10.1097/SHK.0000000000000234
18. Gilmore EJ, Gaspard N, Choi HA, et al. Acute brain failure in severe sepsis: a prospective study in the medical intensive care unit utilizing continuous EEG monitoring. *Intensive Care Med*. 2015;41(4):686-694. doi:10.1007/s00134-015-3709-1
19. Guirgis FW, Leeuwenburgh C, Moldawer L, et al. Lipid and lipoprotein predictors of functional outcomes and long-term mortality after surgical sepsis. *Ann Intensive Care*. 2021;11(1). doi:10.1186/s13613-021-00865-x
20. Haas LEM, Boumendil A, Flaatten H, et al. Frailty is associated with long-term outcome in patients with sepsis who are over 80 years old: Results from an observational study in 241 European ICUs. *Age Ageing*. 2021;50(5):1719-1727. doi:10.1093/ageing/afab036
21. Henriksen DP, Pottegard A, Laursen CB, et al. Intermediate-term and long-term mortality among acute medical patients hospitalized with community-acquired sepsis: A population-based study. *Eur J Emerg Med*. 2017;24(6):404-410. doi:10.1097/MEJ.0000000000000379
22. Honselmann KC, Buthut F, Heuwer B, et al. Long-term mortality and quality of life in intensive care patients treated for pneumonia and/or sepsis. Predictors of mortality and quality of life in patients with sepsis/pneumonia. *J Crit Care*. 2015;30(4):721-726. doi:10.1016/j.jcrc.2015.03.009
23. Jia L, Hao L, Li X, Jia R, Zhang HL. Comparing the predictive values of five scales for 4-year all-cause mortality in critically ill elderly patients with sepsis. *Ann Palliat Med*. 2021;10(3):2387-2397. doi:10.21037/apm-20-1355
24. Jones TK, Fuchs BD, Small DS, et al. Severe Sepsis Is Associated With High Rates Of Hospital Readmission. In: *A96. SEPSIS*. American Thoracic Society International Conference Abstracts. American Thoracic Society; 2014:A2190-A2190. doi:doi:10.1164/ajrccm-conference.2014.189.1\_MeetingAbstracts.A2190
25. Kaukonen KM, Bailey M, Suzuki S, Pilcher D, Bellomo R. Mortality related to severe sepsis and septic shock among critically ill patients in Australia and New Zealand, 2000-2012. *JAMA*. 2014;311(13):1308-1316. doi:10.1001/jama.2014.2637

26. Khoury J, Arow M, Elias A, et al. The prognostic value of brain natriuretic peptide (BNP) in non-cardiac patients with sepsis, ultra-long follow-up. *J Crit Care*. 2017;42:117-122. doi:10.1016/j.jcrc.2017.07.009
27. Kim JS, Kim YJ, Ryoo SM, et al. Risk factors for same pathogen sepsis readmission following hospitalization for septic shock. *J Clin Med*. 2019;8:181. doi:10.3390/jcm8020181
28. Laupland KB, Zygun DA, Doig CJ, Bagshaw SM, Svenson LW, Fick GH. One-year mortality of bloodstream infection-associated sepsis and septic shock among patients presenting to a regional critical care system. *Intensive Care Med*. 2005;31(2):213-219. doi:10.1007/s00134-004-2544-6
29. Lee CC, Chen SY, Tsai CL, et al. Prognostic value of mortality in emergency department sepsis score, procalcitonin, and C-reactive protein in patients with sepsis at the emergency department. *Shock*. 2008;29(3):322-327. doi:10.1097/SHK.0b013e31815077ca
30. Li WS, Chen ZZ, Zheng YJ, et al. The efficacy of parenteral fish oil in critical illness patients with sepsis: A prospective, non-randomized, observational study. *Asia Pac J Clin Nutr*. 2018;27(2):306-312. doi:10.6133/apjcn.032017.07
31. Lichtenauer M, Wernly B, Ohnewein B, et al. The lactate/albumin ratio: A valuable tool for risk stratification in septic patients admitted to ICU. *Int J Mol Sci*. 2017;18(1893). doi:10.3390/ijms18091893
32. Linder A, Guh D, Boyd JH, Walley KR, Anis AH, Russell JA. Long-term (10-year) mortality of younger previously healthy patients with severe sepsis/septic shock is worse than that of patients with nonseptic critical illness and of the general population. *Crit Care Med*. 2014;42(10):2211-2218. doi:10.1097/CCM.0000000000000503
33. Liu A, Yo CH, Nie L, et al. Comparing mortality between positive and negative blood culture results: an inverse probability of treatment weighting analysis of a multicenter cohort. *BMC Infect Dis*. 2021;21(182). doi:10.1186/s12879-021-05862-w
34. Liu V, Lei X, Prescott HC, Kipnis P, Iwashyna TJ, Escobar GJ. Hospital readmission and healthcare utilization following sepsis in community settings. *J Hosp Med*. 2014;9(8):502-507. doi:10.1002/jhm.2197
35. Marcia Contrin Av Brigadeiro Faria Lima L, Manoel S, Marcia Contrin L, et al. Quality of Life of Severe Sepsis Survivors After Hospital Discharge 1. *Rev Lat-Am Enferm*. 2013;21(3):795-802. www.eerp.usp.br/rlae
36. Meurer WJ, Losman ED, Smith BL, Malani PN, Younger JG. Short-term functional decline of older adults admitted for suspected sepsis. *Am J Emerg Med*. 2011;29(8):936-942. doi:10.1016/j.ajem.2010.04.003
37. Nesseler N, Defontaine A, Launey Y, Morcet J, Mallédant Y, Seguin P. Long-term mortality and quality of life after septic shock: A follow-up observational study. *Intensive Care Med*. 2013;39(5):881-888. doi:10.1007/s00134-013-2815-1
38. Norman BC, Cooke CR, Wes Ely E, Graves JA. Sepsis-Associated 30-Day Risk-Standardized Readmissions: Analysis of a Nationwide Medicare Sample. *Crit Care Med*. 2017;45(7):1130-1137. doi:10.1097/CCM.0000000000002476



39. Ou SM, Chu H, Chao PW, et al. Long-term mortality and major adverse cardiovascular events in sepsis survivors a nationwide population-based study. *Am J Respir Crit Care Med*. 2016;194(2):209-217. doi:10.1164/rccm.201510-2023OC
40. Perner A, Haase N, Winkel P, et al. Long-term outcomes in patients with severe sepsis randomised to resuscitation with hydroxyethyl starch 130/0.42 or Ringer's acetate. *Intensive Care Med*. 2014;40(7):927-934. doi:10.1007/s00134-014-3311-y
41. Prescott HC. Variation in postsepsis readmission patterns: A cohort study of veterans affairs beneficiaries. *Ann Am Thorac Soc*. 2017;14(2):230-237. doi:10.1513/AnnalsATS.201605-398OC
42. Prescott HC, Langa KM, Iwashyna TJ. Forty Percent of Hospitalizations After Severe Sepsis are Potentially Preventable. In: *D106. RAISING THE BAR ON OUTCOMES IN CRITICAL ILLNESS*. American Thoracic Society International Conference Abstracts. American Thoracic Society; 2015:A6237-A6237. doi:doi:10.1164/ajrccm-conference.2015.191.1\_MeetingAbstracts.A6237
43. Prescott HC, Langa KM, Iwashyna TJ. Readmission diagnoses after hospitalization for severe sepsis and other acute medical conditions. *JAMA*. 2015;313(10):1055-1057. doi:10.1001/jama.2015.1410
44. Prescott HC, Osterholzer JJ, Langa KM, Angus DC, Iwashyna TJ. Late mortality after sepsis: Propensity matched cohort study. *BMJ*. 2016;353:i2375. doi:10.1136/bmj.i2375
45. Quartin AA, H Schein RM, Kett DH, et al. Magnitude and Duration of the Effect of Sepsis on Survival. *JAMA*. 1997;277(13):1058-1063. <https://jamanetwork.com/>
46. Rahmel T, Schmitz S, Nowak H, et al. Long-term mortality and outcome in hospital survivors of septic shock, sepsis, and severe infections: The importance of aftercare. *PLoS one*. 2020;15(2):e0228952. doi:10.1371/journal.pone.0228952
47. Ranzani OT, Zampieri FG, Forte DN, Azevedo LCP, Park M. C-Reactive Protein/Albumin Ratio Predicts 90-Day Mortality of Septic Patients. *PLoS one*. 2013;8(3). doi:10.1371/journal.pone.0059321
48. Rice D, Simpson K, Goodwin A, Ford D. Patterns of Hospital Readmission Following an Index Hospitalization for Sepsis. *Chest*. 2013;144(4):400A. doi:10.1378/chest.1699902
49. Rygård SL, Holst LB, Wetterslev J, et al. Long-term outcomes in patients with septic shock transfused at a lower versus a higher haemoglobin threshold: the TRISS randomised, multicentre clinical trial. *Intensive Care Med*. 2016;42:1685-1694. doi:10.1007/s00134-016-4437-x
50. Sasse KC, Md M, Nauenberg E, et al. Long-term survival after intensive care unit admission with sepsis. *Clinical Investigation Critical Care Medicine Issue*. 1995;23(6):1040-1047.
51. Scheer CS, Fuchs C, Kuhn SO, et al. Quality improvement initiative for severe sepsis and septic shock reduces 90-day mortality: A 7.5-year observational study. *Crit Care Med*. 2017;45(2):241-252. doi:10.1097/CCM.0000000000002069

52. Schmidt K, Gensichen J, Fleischmann-Struzek C, et al. Long-term survival following sepsis—results of a single-center registry study with four year follow-up. *Dtsch Arztebl Int*. 2020;117(46):775-782. doi:10.3238/arztebl.2020.0775
53. Singh A, Bhagat M, George S v, Gorthi R, Chaturvedula C. Factors Associated with 30-day Unplanned Readmissions of Sepsis Patients: A Retrospective Analysis of Patients Admitted with Sepsis at a Community Hospital. *Cureus*. 2019;11(7). doi:10.7759/cureus.5118
54. Stenholt POO, Abdullah SMO bin, Sørensen RH, Nielsen FE. Independent predictors for 90-day readmission of emergency department patients admitted with sepsis: a prospective cohort study. *BMC Infect Dis*. 2021;21(315). doi:10.1186/s12879-021-06007-9
55. Stiermaier T, Herkner H, Tobudic S, et al. Incidence and long-term outcome of sepsis on general wards and in an ICU at the General Hospital of Vienna: An observational cohort study. *Wien Klin Wochenschr*. 2013;125:302-308. doi:10.1007/s00508-013-0351-1
56. Storgaard M, Hallas J, Gahrn-Hansen B, Pedersen SS, Pedersen C, Lassen AT. Short-and long-term mortality in patients with community-acquired severe sepsis and septic shock. *Scand J Infect Dis*. 2013;45(8):577-583. doi:10.3109/00365548.2013.786836
57. Styrvoky K, Weinreich M, Girod C, Ruggiero R. Beyond Surviving Sepsis: Thirty-Day Readmission Rates and Patient Characteristics at a Safety Net Hospital. *Chest*. 2015;148(4):336A. doi:10.1378/chest.2268558
58. Styrvoky K, Weinreich M, Girod CE, Ruggiero RM. Risk Factors for Thirty-Day Readmissions Among Sepsis Survivors at a Safety Net Hospital. In: *B47. CRITICAL CARE: CLINICAL RESEARCH DISCOVERIES, EPIDEMIOLOGY, AND HEALTH SERVICES FOR SEPSIS*. American Thoracic Society International Conference Abstracts. American Thoracic Society; 2016:A3676-A3676. doi:doi:10.1164/ajrccm-conference.2016.193.1\_MeetingAbstracts.A3676
59. Tacke F, Nuraldeen R, Koch A, et al. Iron parameters determine the prognosis of critically ill patients. *Crit Care Med*. 2016;44(6):1049-1058. doi:10.1097/CCM.0000000000001607
60. Tacke F, Roderburg C, Benz F, et al. Levels of circulating mir-133a are elevated in sepsis and predict mortality in critically ill patients. *Crit Care Med*. 2014;42(5):1096-1104. doi:10.1097/CCM.0000000000000131
61. Taylor SP, Chou SH, Sierra MF, et al. Association between adherence to recommended care and outcomes for adult survivors of sepsis. *Ann Am Thorac Soc*. 2020;17(1):89-97. doi:10.1513/AnnalsATS.201907-514OC
62. Tsaganos T, Raftogiannis M, Pratikaki M, et al. Clarithromycin leads to long-term survival and cost benefit in ventilator-associated pneumonia and sepsis. *Antimicrob Agents Chemother*. 2016;60(6):3640-3646. doi:10.1128/AAC.02974-15
63. Tsen R, Seoane L, Li D, Pavlov A, Winterbottom F, Nash T. Frequency and Timing of Readmissions Among Survivors of Severe Sepsis and Septic Shock. In: *D106. RAISING THE BAR ON OUTCOMES IN CRITICAL ILLNESS*. American Thoracic Society International Conference Abstracts. American Thoracic Society; 2015:A6240-A6240. doi:doi:10.1164/ajrccm-conference.2015.191.1\_MeetingAbstracts.A6240

64. Vashi AA, Fox JP, Carr BG, et al. Use of hospital-based acute care among patients recently discharged from the hospital. *JAMA*. 2013;309(4):364-371. doi:10.1001/jama.2012.216219
65. Vasile VC, Chai HS, Abdeldayem D, Afessa B, Jaffe AS. Elevated cardiac troponin T levels in critically ill patients with sepsis. *Am J Med*. 2013;126(12):1114-1121. doi:10.1016/j.amjmed.2013.06.029
66. Wang HE, Szychowski JM, Griffin R, Safford MM, Shapiro NI, Howard G. Long-term mortality after community-acquired sepsis: A longitudinal population-based cohort study. *BMJ Open*. 2014;4. doi:10.1136/bmjopen-2013-004283
67. Weinreich MA, Styrvoky K, Chang S, Girod CE, Ruggiero R. Sepsis at a Safety Net Hospital: Risk Factors Associated With 30-Day Readmission. *J Intensive Care Med*. 2019;34(11-12):1017-1022. doi:10.1177/0885066617726753
68. Weycker D, Akhras KS, Edelsberg J, Angus DC, Oster G. Long-term mortality and medical care charges in patients with severe sepsis. *Crit Care Med*. 2003;31(9):2316-2323. doi:10.1097/01.CCM.0000085178.80226.0B
69. Whiles B, Deis A, Miller P, Simpson S. Comorbid Conditions Predict Outcomes in Patients With Severe Sepsis. *Chest*. 2016;149(4):A170. doi:10.1016/j.chest.2016.02.176
70. Yende S, Kellum JA, Talisa VB, et al. Long-term Host Immune Response Trajectories among Hospitalized Patients with Sepsis. *JAMA Netw Open*. 2019;2(8). doi:10.1001/jamanetworkopen.2019.8686
71. Yende S, Linde-Zwirble W, Mayr F, Weissfeld LA, Reis S, Angus DC. Risk of cardiovascular events in survivors of severe sepsis. *Am J Respir Crit Care Med*. 2014;189(9):1065-1074. doi:10.1164/rccm.201307-1321OC
72. Zhao P yue, Yao R qi, Ren C, et al. De Ritis Ratio as a Significant Prognostic Factor in Patients with Sepsis: A Retrospective Analysis. *J Surg Res*. 2021;264:375-385. doi:10.1016/j.jss.2021.03.018
73. Zilberberg MD, Shorr AF, Micek ST, Kollef MH. Risk factors for 30-day readmission among patients with culture-positive severe sepsis and septic shock: A retrospective cohort study. *J Hosp Med*. 2015;10(10):678-685. doi:10.1002/jhm.2420

# PROTOCOL FOR SYSTEMATIC REVIEW OF THE ASSESSMENT OF SOCIAL DETERMINANTS OF HEALTH IN STUDIES OF POST-SEPSIS OUTCOMES

## Rationale

Sepsis, life-threatening organ dysfunction caused by a dysregulated host response to infection, is responsible for significant acute and chronic morbidity and mortality.<sup>refs</sup> Two commonly studied adverse outcomes for sepsis survivors are i) rehospitalization and of ii) long-term mortality. Systematic reviews have reported a mean 1-year rehospitalization rate of 39.0% (95% CI, 22.0%-59.4%) and a mean 1-year mortality rate of 16.1% (95% CI, 14.1%-18.1%) among adult sepsis survivors. A systematic review of rehospitalization risk factors (predictors) for sepsis survivors that included 56 studies highlighted characteristics that were predictors of increased risk of readmission across studies, categorized as generic, sepsis-specific, and hospital-level factors.

Despite the increased attention to recovery after sepsis, an important topic that remains unknown is the association of social determinants of health (SDH) with adverse outcomes. The clinical significance of SDH has been demonstrated in numerous other settings, and SDH may be a particularly salient contributor to the risk of hospital readmission. Indeed, a number of studies have demonstrated the relationship between SDH and hospital readmission. We found no systematic reviews to date that explore the relationship between SDH and risk for rehospitalization or mortality after sepsis in adults. Understanding the social determinants that impact adverse outcomes after sepsis is important to inform interventions that adequately address the whole-person needs of sepsis survivors.

## Purpose and objectives

The proposed review aims to summarize knowledge and identify gaps in evidence about the relationship between social determinants and post-sepsis outcomes.

## Research question

Is there evidence to support the association between social determinants of health and mortality or rehospitalization after sepsis in adults?

## Methods

This study will conform to the PRISMA guidelines for systematic reviews, and is registered with the International prospective register of systematic reviews (PROSPERO CRD pending).

## Inclusion criteria

We will search for both randomized clinical trials (RCTs) and observational studies published since 1992 in the following databases: MEDLINE (including in-process and non-indexed citations), Cochrane Library and its associated databases (including Database of Abstracts of Reviews of Effects (DARE), Web of Science, and EMBASE. The search strategy will use controlled vocabulary terms and text words for sepsis and post-sepsis mortality or hospital readmission, and the search set will be limited to humans and English language. Subject headings will be exploded and mapped to the appropriate controlled vocabulary terms. The year 1992 was chosen to coincide with the year of publication of the first consensus sepsis definitions. The full electronic search strategy for MEDLINE is presented in Appendix 1 and modified for other databases. The initial literature search was on XX and was updated on YY.

## Study Selection

Two reviewers will independently screen citations for those reporting either of the primary outcomes after index sepsis discharge i) all-cause mortality or ii) hospital readmission in the title or abstract. The full text of any citation considered potentially relevant by either reviewer will be retrieved. Eligible studies have a cohort, case–control, or Randomized-Controlled Trial (RCT) design; enrolled hospital survivors of an admission for sepsis; and reported all-cause

readmission or late mortality as a primary outcome. For inclusion into the review, sepsis was defined as infection-related organ dysfunction managed in hospital setting and includes studies that used the equivalent terminology of sepsis, severe sepsis, and septic shock. We will exclude studies restricted to children and to special populations such as those with HIV, cancer, and other immunocompromised states. We will also exclude studies enrolling survivors of uncomplicated infections, such as pneumonia, without referring to organ dysfunction or to International Classification of Diseases (ICD) codes for sepsis, severe sepsis, or septic shock in their index sepsis case definitions. We will screen reference lists of included studies, related review articles, and editorials.

#### Data collection and validity assessment

When two or more studies are identified that reported data from the same patient cohort, the most relevant article will be identified as the most recent full manuscript. Three authors will extract data from the included studies and issues of uncertainty will be resolved by consensus. We will include full manuscripts and conference abstracts for assessing the count of studies assessing social determinants but only the full manuscripts for assessing social determinants as independent risk factors. From each of the included studies, we will extract data on study design, number of patients, duration of follow-up, description of index sepsis admission, rehospitalization events, mortality events, and social determinants assessed as independent risk factors for rehospitalization (see Data Abstraction form, Appendix 2).

#### Assessment of methodological quality

For studies reported as full-text manuscripts, study quality will be assessed using domains from the modified Newcastle Ottawa Score (NOS) checklist. These include patient selection (cohort data source for representativeness of exposed cohort, selection of nonexposed cohort, exposure ascertainment using sepsis definitions or International Classification of Diseases

codes), minimum duration of follow-up for outcome to occur of 30 days, assessment of confounding (use of comparator populations, matching, restriction, stratification, and regression), and outcome (outcome assessment, length, and adequacy of follow-up). The SDH reported as independent risk factors for mortality and rehospitalization will be identified from studies that used regression models to account for confounders.

### Ethics and Dissemination

Approval from a research ethics board will not be required for this review. Once completed, the review will be submitted for publication in a peer-reviewed journal, and findings will be presented in local and national forums.

### Data analysis

The co-primary outcomes are all-cause rehospitalization and all-cause mortality occurring after index hospitalization among sepsis survivors, at follow-up time points as reported in studies. We will provide a descriptive comparison of social determinants included among studies, the methodological quality of SDH data, and those social determinants identified as increasing the risk of rehospitalization or mortality in sepsis survivors between studies.

### Discussion

This review will be the first review to focus on social determinants of health in the context of post-sepsis adverse outcomes. Most current research focuses on biologic or illness-related risk factors for adverse outcomes after sepsis. Such risk factors include age, gender, comorbidities, and severity of illness. Although understanding biologic risk factors is important to addressing post-sepsis outcomes, social factors have been implicated in the progression and development of many health conditions and are likely important contributors to post-sepsis outcomes as well. The discovery of which social determinants affect recovery after sepsis is pivotal to advancing knowledge to further guide support and management approaches in this vulnerable population.

Table 1. Description of studies assessing SDH and post-sepsis outcomes

| Study ID (Author, year) | Cohort data source (single/multi center, n = ) | Cohort description | Follow-up method and outcome assessment | Social determinants included | Social determinant assessment method (HER, survey, census) | Social determinant level (individual or neighborhood) | Missing data on social determinants (low, high) | Confounder assessment | Non-sepsis comparisons |
|-------------------------|------------------------------------------------|--------------------|-----------------------------------------|------------------------------|------------------------------------------------------------|-------------------------------------------------------|-------------------------------------------------|-----------------------|------------------------|
|                         |                                                |                    |                                         |                              |                                                            |                                                       |                                                 |                       |                        |
|                         |                                                |                    |                                         |                              |                                                            |                                                       |                                                 |                       |                        |
|                         |                                                |                    |                                         |                              |                                                            |                                                       |                                                 |                       |                        |
|                         |                                                |                    |                                         |                              |                                                            |                                                       |                                                 |                       |                        |

Table 2. Summary of full manuscripts included in the review and SDOH associated with increased risk of rehospitalization or mortality in studies reporting regression models

| Study ID | Study characteristics (Data source and sample size) | Regression model for the outcome | SDOH with independent association with rehospitalization | SDOH with independent association with mortality |
|----------|-----------------------------------------------------|----------------------------------|----------------------------------------------------------|--------------------------------------------------|
|          |                                                     |                                  |                                                          |                                                  |
|          |                                                     |                                  |                                                          |                                                  |
|          |                                                     |                                  |                                                          |                                                  |

## Appendix

### Search strategy

((("sepsis"[MeSH Terms] OR "shock, septic"[MeSH Terms] OR "sepsis"[Text Word] OR "severe sepsis"[Text Word] OR "sepsis syndrome\*"[Text Word] OR "septic\*"[Text Word]) AND (1992/01/01:2021/05/01[Date - Publication] AND "english"[Language]) AND (((("patient readmission"[MeSH Terms] OR "patient readmission"[MeSH Terms] OR "readmission\*"[Text Word] OR "rehospitalization\*"[Text Word] OR "rehospitalisation\*"[Text Word]) AND (1992/01/01:2021/05/01[Date - Publication] AND "english"[Language])) OR ("late mortality"[Text Word] OR "long-term mortality"[Text Word] OR ("post-discharge"[Text Word] OR "after discharge"[Text Word])) AND (1992/01/01:2021/05/01[Date - Publication] AND "english"[Language]))) AND ((1992/1/1:2021/5/1[pdat]) AND (english[Filter]))
